# Supplementary material for: Sustainable superhydrophobic lignin-based polyurethane foam: an innovative solution for oil pollutant adsorption
Source: Royal Society of Chemistry journal article supplement (doi:10.1039/d4ra07384c), 2025-01-01
Supplement: d4ra07384c5.pdf [file d4ra07384c5.pdf]

## Supporting Information

### **Sustainable Superhydrophobic Lignin-Based Polyurethane Foam: An Innovative Solution for Oil Pollutant Adsorption**

Xinglin Li <sup>a</sup>, Jing Zhang <sup>a</sup>, Hong Liu <sup>b</sup>, Zhiyu Li<sup>\*, a</sup>, Guanfeng Zheng <sup>a</sup>, Ling Zhou <sup>c</sup>,  
Peng Fu<sup>\*, a</sup>

*<sup>a</sup>. College of Agricultural Engineering and Food Science, Shandong University of Technology,  
Zibo, 255000, China*

*<sup>b</sup>. Binzhou Inspection and Testing Center, Binzhou, 256600, China*

*<sup>c</sup>. Modern Agricultural Engineering Key Laboratory at Universities of Education Department of  
Xinjiang Uygur Autonomous Region, and School of Mechanical Electrification Engineering,  
Tarim University, Alaer 843300, China*

#### **Correspondence**

\* To whom correspondence should be addressed: Zhiyu Li (Email: [tarimlizhiyu@hotmail.com](mailto:tarimlizhiyu@hotmail.com)),  
Peng Fu (Email: [fupengsdut@163.com](mailto:fupengsdut@163.com)).

## Supplementary Caption

**Table S1.** LLP formulations with different amounts of lignin.

**Table S2.** Formulations of LPUFs with Different Lignin Content in LLPs.

**Table S3.** The hydroxyl values of LLPs obtained using  $^{31}\text{P}$ -NMR analysis.

**Fig. S1.** 30-cycle compression curve of LPUF30-0.

**Fig. S2.** Self-cleaning test of LPUF30-2.

**Fig. S3.** Photographs of LPUF30-2 degradation in methanol-0.2 mol/L sodium hydroxide aqueous solution (60 °C) over time

**Video S1.** The Video of adsorption process of toluene on water surface using LPUF30-2.

**Video S2.** The Video of adsorption process of dichloromethane under water by LPUF30-2.

**Video S3.** The video of LPUF30-2 performing oil-water separation for a chloroform and water mixture.

**Video S4.** The Video of adsorption process of crude oil under solar radiation by LPUF30-2.

**Table S1.** LLP formulations with different amounts of lignin.

|         | PEG-400/g | Glycerol/g | Lignin/g | Sulfuric acid/g |
|---------|-----------|------------|----------|-----------------|
| LLP15   | 80        | 20         | 15       | 2.25            |
| LLP22.5 | 80        | 20         | 22.5     | 3.375           |
| LLP30   | 80        | 20         | 30       | 4.5             |
| LLP37.5 | 80        | 20         | 37.5     | 5.625           |

**Table S2.** Formulations of LPUFs with Different Lignin Content in LLPs.

|          | Lignin-based polyols (g) | DBTDL (g) | Water (g) | HDI (g) |
|----------|--------------------------|-----------|-----------|---------|
| LPUF15   | 20.0                     | 0.2       | 0.06      | 13.85   |
| LPUF22.5 | 20.0                     | 0.2       | 0.06      | 12.83   |
| LPUF30   | 20.0                     | 0.2       | 0.06      | 12.16   |

**Table S3.** The hydroxyl values of LLPs obtained using  $^{31}\text{P}$ -NMR analysis.

|         | hydroxyl values/mmol/g |
|---------|------------------------|
| LLP15   | 7.9                    |
| LLP22.5 | 7.3                    |
| LLP30   | 6.9                    |
| LLP37.5 | 6.7                    |

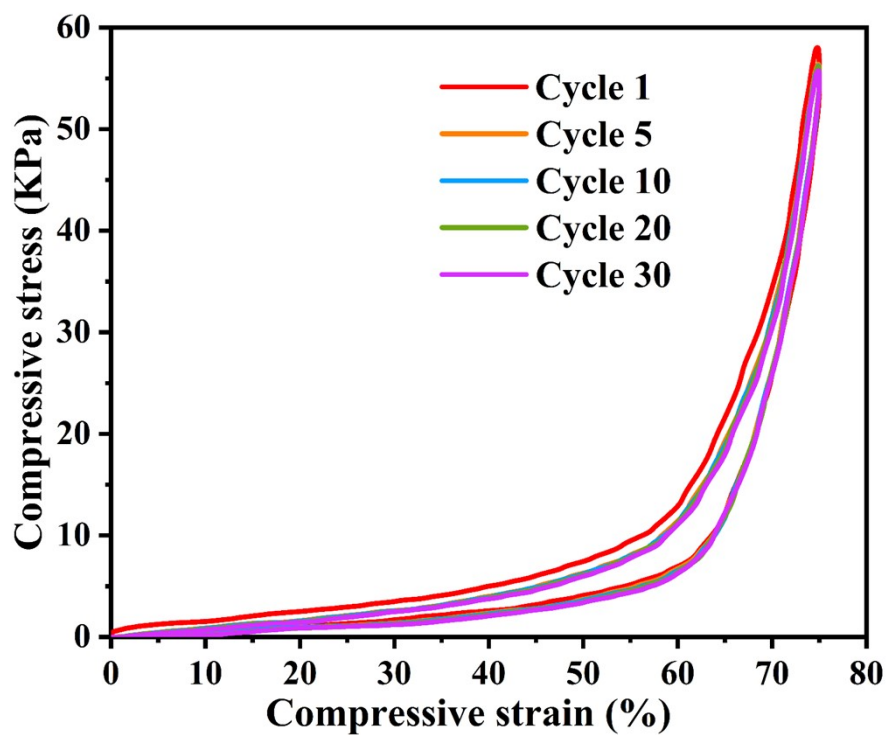

Fig. S1. 30-cycle compression curve of LPUF30-0.

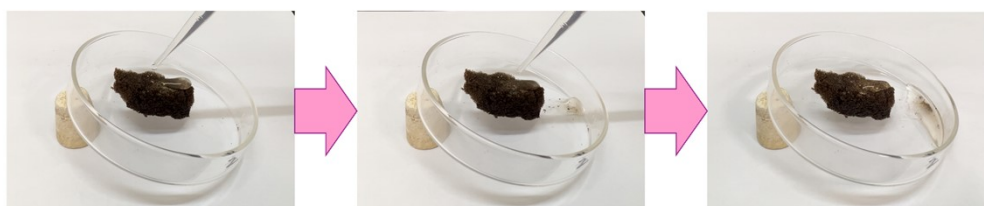

Fig. S2. Self-cleaning test of LPUF30-2.

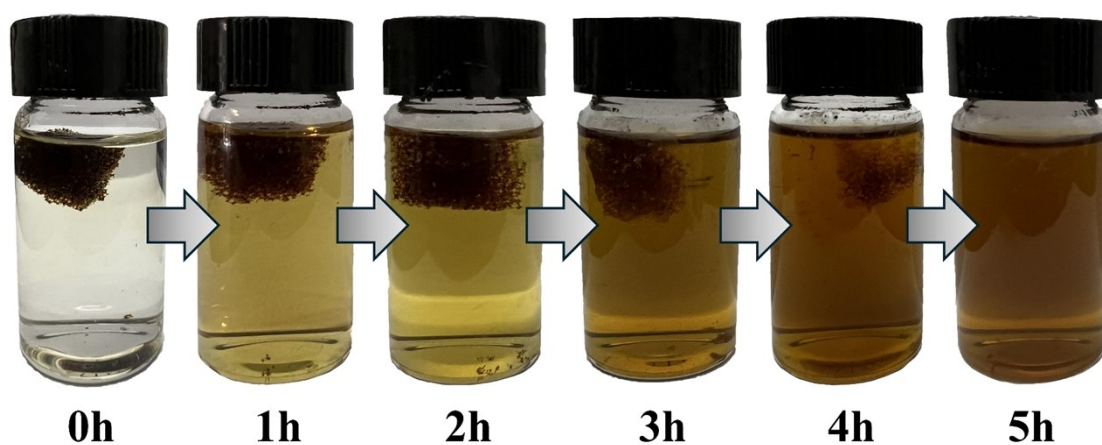

Fig. S3. Photographs of LPUF30-2 degradation in methanol-0.2 mol/L sodium hydroxide aqueous solution (60°C) over time.
