# Supplementary figures and images for: Sustainable superhydrophobic lignin-based polyurethane foam: an innovative solution for oil pollutant adsorption
Source: Royal Society of Chemistry journal article supplement (doi:10.1039/d4ra07384c), 2025-01-01

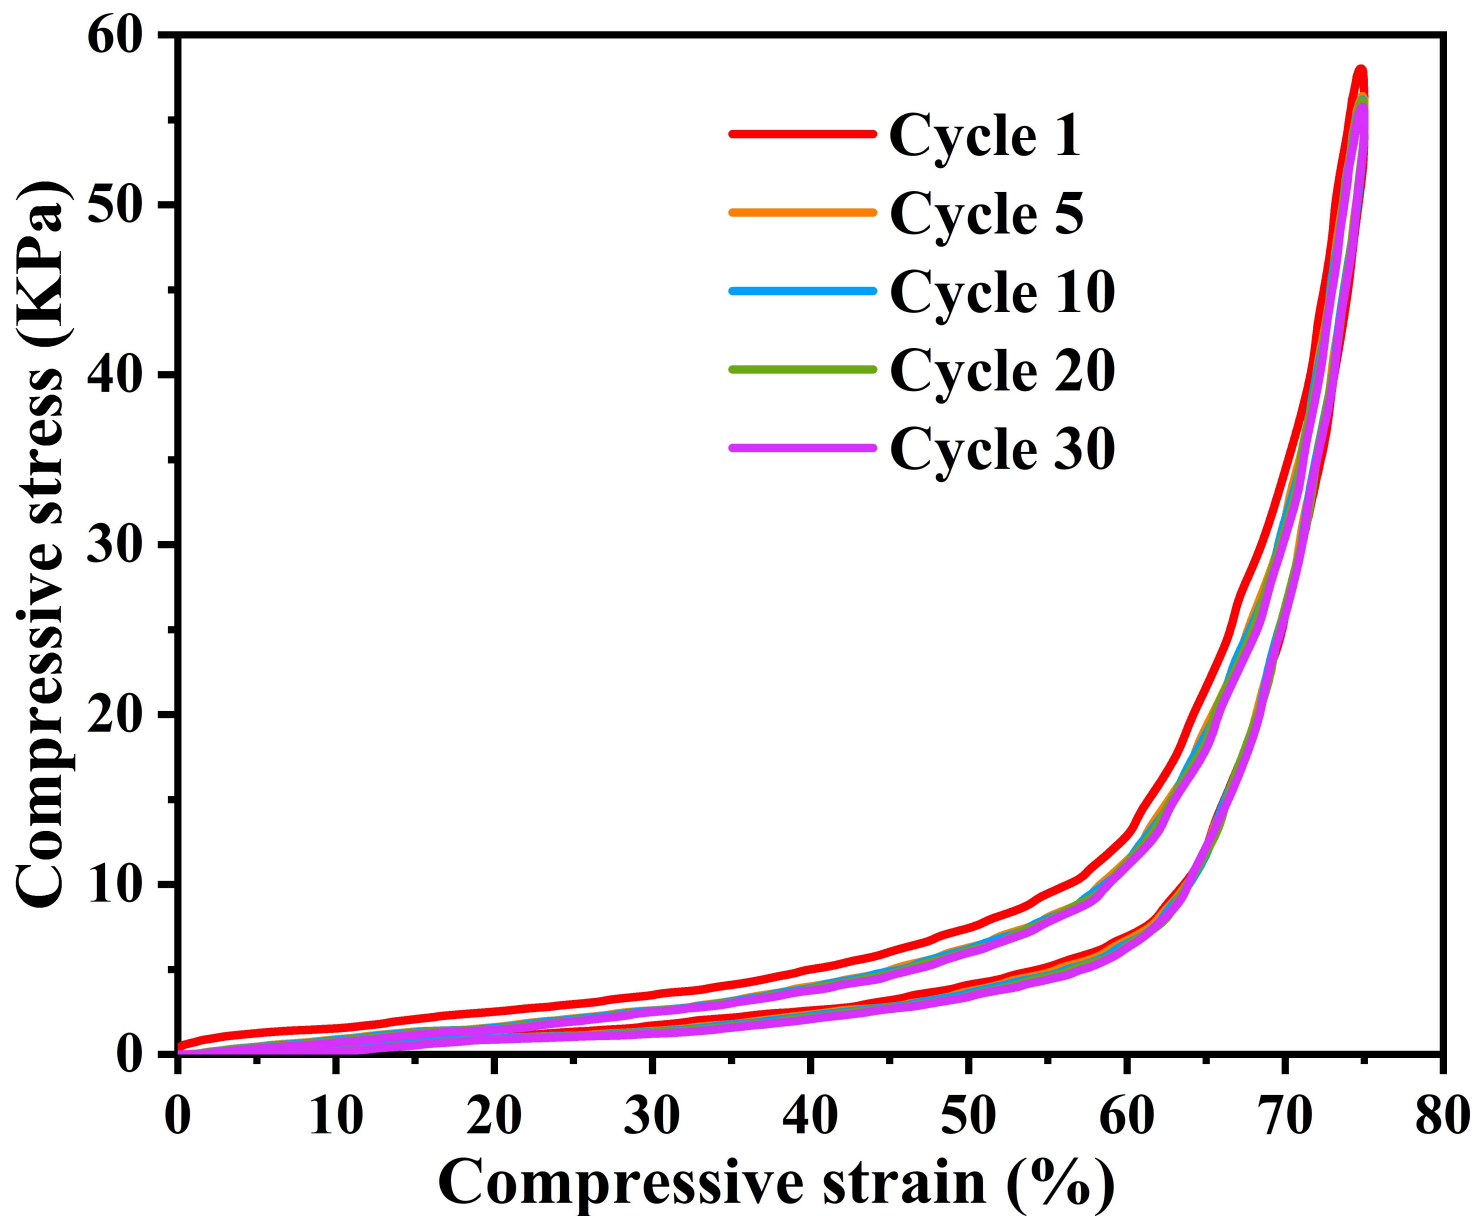

Supplement: d4ra07384c2.pdf [file d4ra07384c2.pdf]

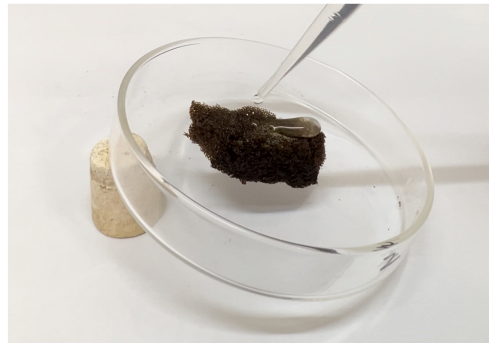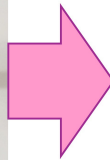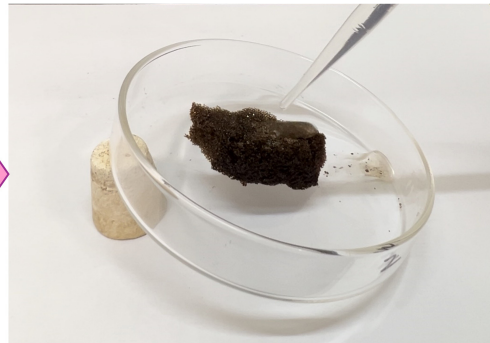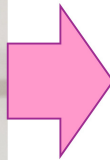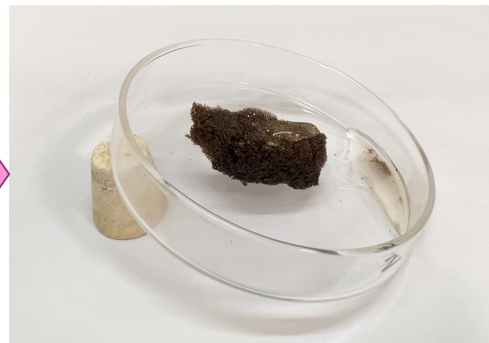

Supplement: d4ra07384c3.pdf [file d4ra07384c3.pdf]

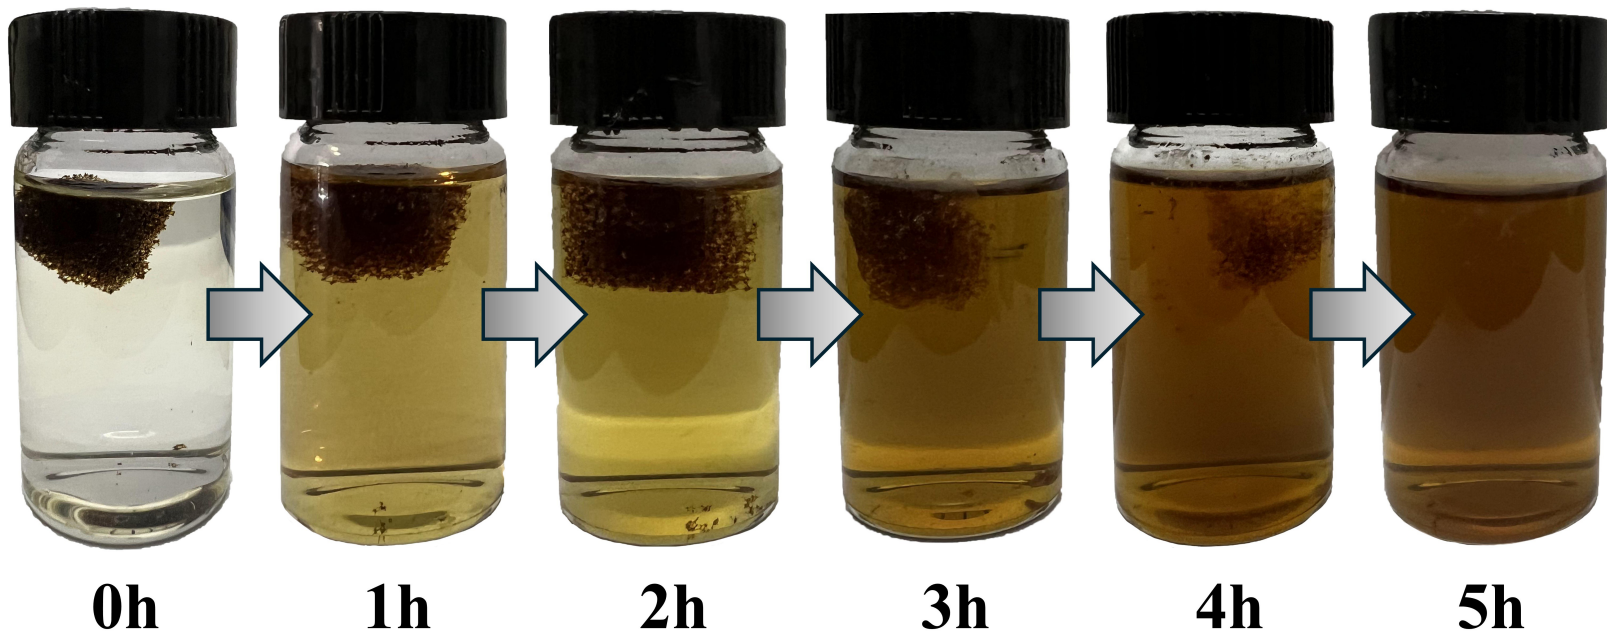

Supplement: d4ra07384c4.pdf [file d4ra07384c4.pdf]
